# Supplementary material for: The co-enhanced effect of Zn-doping and Ag-loading on the selectivity of a p-type Fe2O3 toward acetone
Source: Royal Society of Chemistry journal article supplement (doi:10.1039/d3nj01782f), 2023-01-01
Supplement: d3nj01782f1.pdf [file d3nj01782f1.pdf]

## Supporting information

### Co-enhanced effect of Zn-doping and Ag-loading on the selectivity of a p-type Fe<sub>2</sub>O<sub>3</sub> toward acetone

Qixuan Qin<sup>a</sup>, Na Liu<sup>a</sup>, Yan Zhang<sup>a</sup>, Weiyi Bu<sup>a</sup>, Zhijie Zhou<sup>b</sup>, Changhua Hu<sup>b</sup>,  
Xiaohong Chuai<sup>a\*</sup>

<sup>a</sup> *State Key Laboratory of Integrated Optoelectronics, Key Laboratory of Advanced Gas Sensors, Jilin Province, College of Electronic Science and Engineering, International Center of Future Science, Jilin University, 2699 Qianjin Street, Changchun 130012, China*

<sup>b</sup> *High-Tech Institute of Xi'an, Shanxi Province, Xian 710025, China*

\* Corresponding authors:

Xiaohong Chuai, Tel.: +86-431-85167808; fax: +86-431-85167808.

Email: xhchuai@jlu.edu.cn.

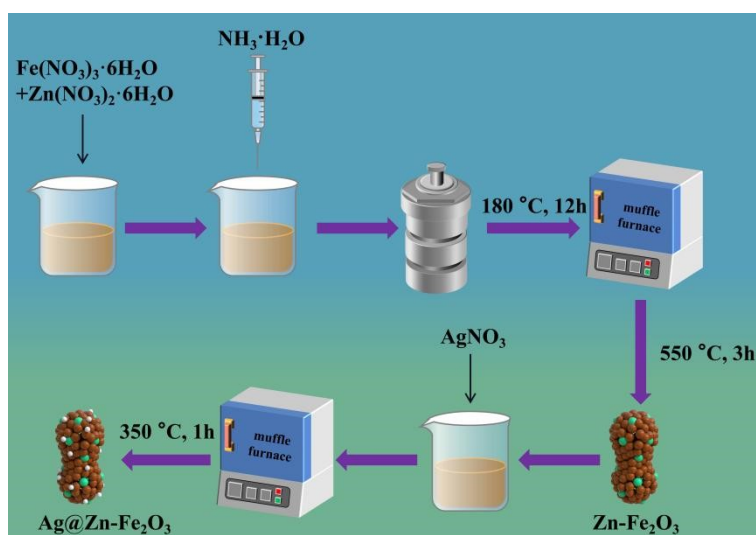

**Fig. S1.** The schematic illustration of the synthesis of Ag@Zn-Fe<sub>2</sub>O<sub>3</sub>.

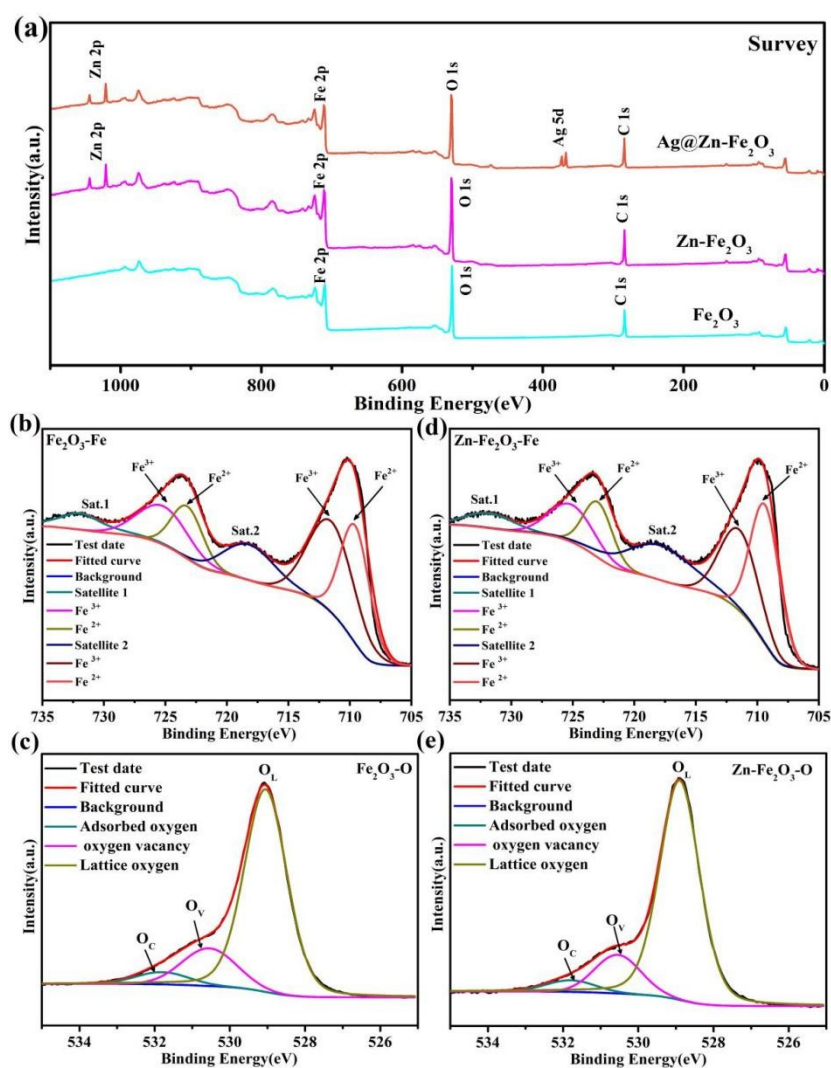

**Fig. S2.** (a) XPS survey scan spectrum of Fe<sub>2</sub>O<sub>3</sub>, Zn-Fe<sub>2</sub>O<sub>3</sub>, and Ag@Zn-Fe<sub>2</sub>O<sub>3</sub>, O 1s spectra of (b) Fe<sub>2</sub>O<sub>3</sub> and (c) Zn-Fe<sub>2</sub>O<sub>3</sub>.

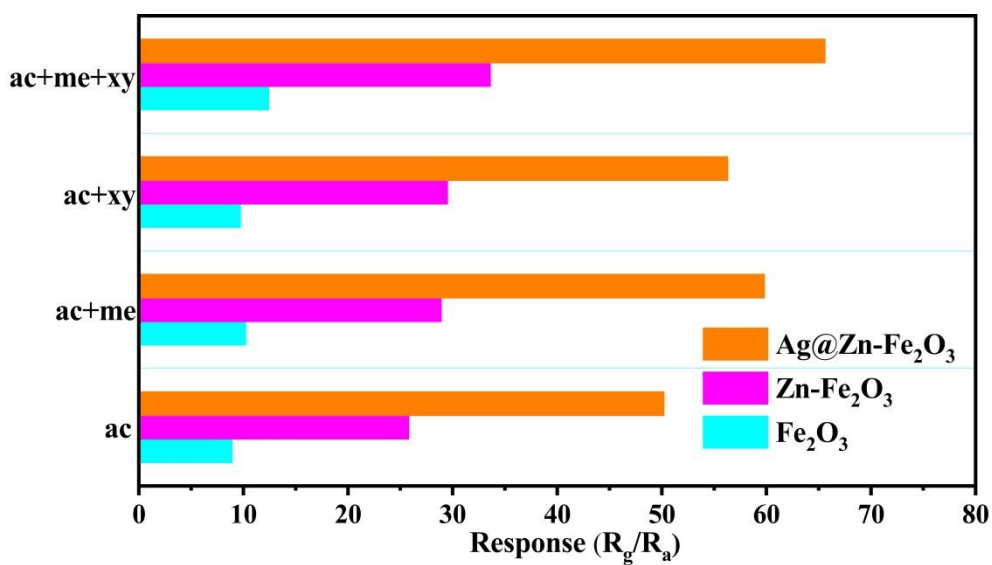

**Fig. S3.** Response of the Fe<sub>2</sub>O<sub>3</sub>, Zn-Fe<sub>2</sub>O<sub>3</sub>, and Ag@Zn-Fe<sub>2</sub>O<sub>3</sub> sensors to mixture gases (100 ppm) at 172 or 150°C. (ac= acetone, me= methanol, and xy= xylene)

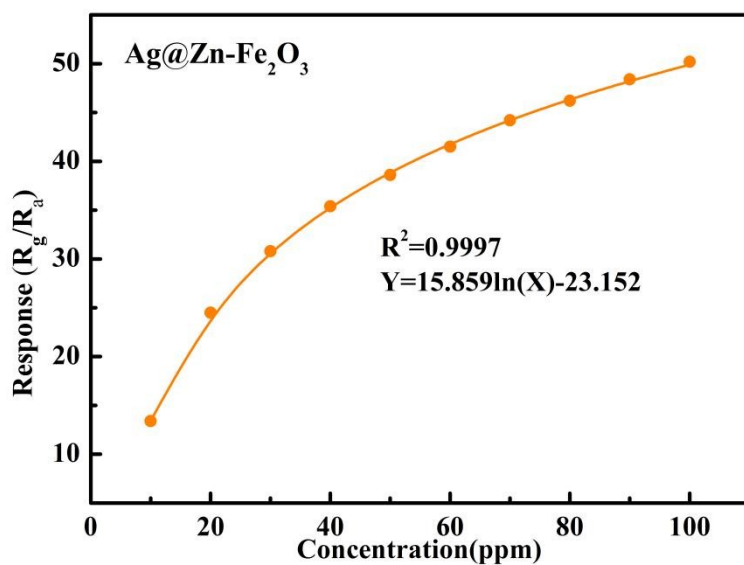

**Fig. S4.** Response of the Ag@Zn-Fe<sub>2</sub>O<sub>3</sub> sensors as a function of acetone concentration (10-100 ppm) at 172 or 150°C.

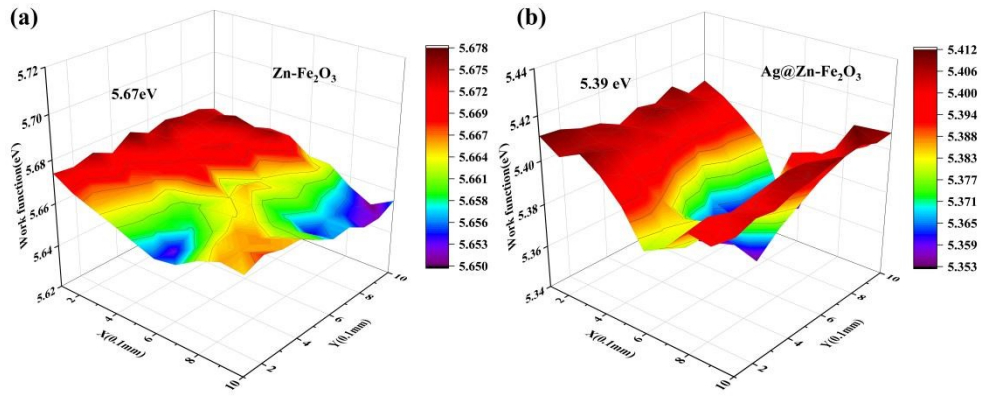

**Fig. S5.** Work function area scan record of (a)  $\text{Zn-Fe}_2\text{O}_3$  and (b)  $\text{Ag@Zn-Fe}_2\text{O}_3$  via Kelvin probe measurements.

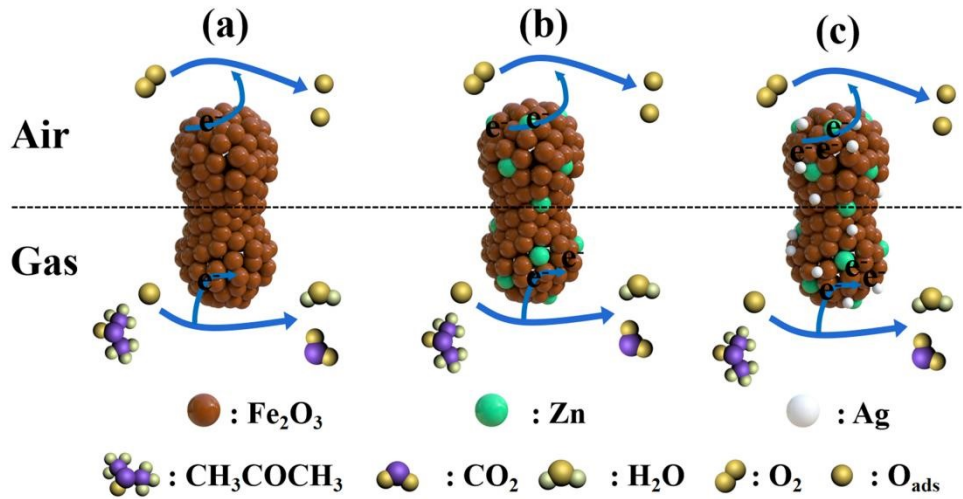

**Fig. S6.** Schematic of the gas sensing mechanism for the  $\text{Fe}_2\text{O}_3$ ,  $\text{Zn-Fe}_2\text{O}_3$ , and  $\text{Ag@Zn-Fe}_2\text{O}_3$  sensors.

| Samples                       | element | Atomic % |       |       |       |
|-------------------------------|---------|----------|-------|-------|-------|
|                               |         | Ag 3d    | Zn 2p | Fe 2p | O 1s  |
| $\text{Fe}_2\text{O}_3$       |         | 0        | 0     | 29.56 | 70.43 |
| $\text{Zn-Fe}_2\text{O}_3$    |         | 0        | 2.29  | 27.72 | 69.98 |
| $\text{Ag@Zn-Fe}_2\text{O}_3$ |         | 1.38     | 2.08  | 27.12 | 69.41 |

**Table. S1.** The relative percentage of Ag, Zn, Fe, and O elements in the  $\text{Fe}_2\text{O}_3$ ,  $\text{Zn-Fe}_2\text{O}_3$ , and  $\text{Ag@Zn-Fe}_2\text{O}_3$  samples of XPS analysis.

| Samples                              | O        | O <sub>L</sub> | O <sub>V</sub> | O <sub>C</sub> |
|--------------------------------------|----------|----------------|----------------|----------------|
|                                      | Atomic % |                |                |                |
| Fe <sub>2</sub> O <sub>3</sub>       |          | 81.46          | 13.82          | 4.71           |
| Zn-Fe <sub>2</sub> O <sub>3</sub>    |          | 79.08          | 17.55          | 3.36           |
| Ag@Zn-Fe <sub>2</sub> O <sub>3</sub> |          | 75.38          | 20.51          | 4.08           |

**Table. S2.** The relative percentage of O<sub>L</sub>, O<sub>V</sub>, and O<sub>C</sub> in the Fe<sub>2</sub>O<sub>3</sub>, Zn-Fe<sub>2</sub>O<sub>3</sub>, and Ag@Zn-Fe<sub>2</sub>O<sub>3</sub> samples of XPS analysis.
